# Supplementary material for: The Biomarker TCONS_00016233 Drives Septic AKI by Targeting the miR-22-3p/AIFM1 Signaling Axis
Source: PubMed Central journal article supplement — Mol Ther Nucleic Acids. 2020 Jan 14;19:1027–42. doi: 10.1016/j.omtn.2019.12.037 (PMC7016165; doi:10.1016/j.omtn.2019.12.037), 2020-01-14
Supplement: mmc2.pdf [file mmc2.pdf]

| supplementary table1                          | supplementary table2                              | supplementary table3                                                              |
|-----------------------------------------------|---------------------------------------------------|-----------------------------------------------------------------------------------|
| Septic AKI vs control<br>upregulation LncRNAs | Septic non-AKI vs control<br>upregulation LncRNAs | Septic AKI vs control and<br>Septic non-AKI vs control<br>co-upregulation LncRNAs |
| TCONS_00029924                                | TCONS_00000483                                    | TCONS_00016233                                                                    |
| TCONS_00029904                                | TCONS_00000801                                    | TCONS_00024360                                                                    |
| TCONS_00029895                                | TCONS_00000802                                    | TCONS_00018648                                                                    |
| TCONS_00029855                                | TCONS_00000807                                    | TCONS_00026991                                                                    |
| TCONS_00029847                                | TCONS_00000861                                    | TCONS_00023502                                                                    |
| TCONS_00029834                                | TCONS_00016233                                    | TCONS_00019585                                                                    |
| TCONS_00029793                                | TCONS_00001003                                    | TCONS_00011672                                                                    |
| TCONS_00029745                                | TCONS_00001027                                    | TCONS_00026520                                                                    |
| TCONS_00029727                                | TCONS_00001172                                    | TCONS_00019666                                                                    |
| TCONS_00029706                                | TCONS_00001176                                    | TCONS_00013713                                                                    |
| TCONS_00029696                                | TCONS_00001191                                    | TCONS_00012628                                                                    |
| TCONS_00029694                                | TCONS_00001234                                    | TCONS_00015305                                                                    |
| TCONS_00029622                                | TCONS_00001243                                    | TCONS_00000861                                                                    |
| TCONS_00029615                                | TCONS_00001323                                    | TCONS_00007959                                                                    |
| TCONS_00029585                                | TCONS_00001368                                    | TCONS_00001763                                                                    |
| TCONS_00029538                                | TCONS_00001386                                    | TCONS_00019285                                                                    |
| TCONS_00029529                                | TCONS_00001406                                    | TCONS_00012030                                                                    |
| TCONS_00029515                                | TCONS_00001418                                    | TCONS_00018089                                                                    |
| TCONS_00029279                                | TCONS_00001436                                    | TCONS_00001644                                                                    |
| TCONS_00029274                                | TCONS_00001483                                    | TCONS_00001838                                                                    |
| TCONS_00029245                                | TCONS_00001488                                    | TCONS_00013003                                                                    |
| TCONS_00029215                                | TCONS_00001552                                    | TCONS_00028112                                                                    |
| TCONS_00029195                                | TCONS_00001583                                    | TCONS_00015176                                                                    |
| TCONS_00029178                                | TCONS_00001603                                    | TCONS_00004986                                                                    |
| TCONS_00029174                                | TCONS_00001629                                    | TCONS_00028196                                                                    |
| TCONS_00029161                                | TCONS_00001644                                    | TCONS_00028986                                                                    |
| TCONS_00029153                                | TCONS_00001707                                    | TCONS_00018527                                                                    |
| TCONS_00029142                                | TCONS_00001709                                    | TCONS_00029529                                                                    |
| TCONS_00029116                                | TCONS_00001737                                    | TCONS_00012630                                                                    |
| TCONS_00029046                                | TCONS_00001763                                    | TCONS_00013993                                                                    |
| TCONS_00029028                                | TCONS_00001780                                    | TCONS_00014652                                                                    |
| TCONS_00029027                                | TCONS_00001801                                    | TCONS_00018340                                                                    |
| TCONS_00029015                                | TCONS_00001809                                    | TCONS_00009849                                                                    |
| TCONS_00029013                                | TCONS_00001810                                    | TCONS_00026236                                                                    |
| TCONS_00029007                                | TCONS_00001814                                    | TCONS_00011706                                                                    |

|                |                |                |
|----------------|----------------|----------------|
| TCONS_00029006 | TCONS_00001819 | TCONS_00022027 |
| TCONS_00028986 | TCONS_00001838 | TCONS_00024450 |
| TCONS_00028725 | TCONS_00001900 | TCONS_00022841 |
| TCONS_00028623 | TCONS_00001909 | TCONS_00006193 |
| TCONS_00028585 | TCONS_00002094 | TCONS_00025221 |
| TCONS_00028572 | TCONS_00002218 | TCONS_00018127 |
| TCONS_00028564 | TCONS_00002290 | TCONS_00021852 |
| TCONS_00028560 | TCONS_00002412 | TCONS_00028455 |
| TCONS_00028514 | TCONS_00002580 | TCONS_00018839 |
| TCONS_00028455 | TCONS_00002621 | TCONS_00018621 |
| TCONS_00028448 | TCONS_00002901 | TCONS_00013590 |
| TCONS_00028434 | TCONS_00003331 | TCONS_00003770 |
| TCONS_00028433 | TCONS_00003544 | TCONS_00027517 |
| TCONS_00000861 | TCONS_00003564 | TCONS_00001172 |
| TCONS_00028347 | TCONS_00003611 | TCONS_00015107 |
| TCONS_00028345 | TCONS_00003655 | TCONS_00023094 |
| TCONS_00028341 | TCONS_00003770 | TCONS_00018191 |
| TCONS_00028340 | TCONS_00003791 | TCONS_00023134 |
| TCONS_00028332 | TCONS_00003822 | TCONS_00022087 |
| TCONS_00028324 | TCONS_00003831 | TCONS_00007264 |
| TCONS_00028265 | TCONS_00003836 | TCONS_00015306 |
| TCONS_00028235 | TCONS_00003851 | TCONS_00015375 |
| TCONS_00028216 | TCONS_00003940 | TCONS_00013741 |
| TCONS_00028196 | TCONS_00003952 | TCONS_00006792 |
| TCONS_00028192 | TCONS_00003970 | TCONS_00028564 |
| TCONS_00028191 | TCONS_00004000 | TCONS_00016122 |
| TCONS_00028131 | TCONS_00004015 | TCONS_00001603 |
| TCONS_00028126 | TCONS_00004033 | TCONS_00008503 |
| TCONS_00028114 | TCONS_00004039 | TCONS_00001809 |
| TCONS_00028112 | TCONS_00004041 | TCONS_00023648 |
| TCONS_00028111 | TCONS_00004141 | TCONS_00019257 |
| TCONS_00028110 | TCONS_00004164 | TCONS_00020994 |
| TCONS_00028099 | TCONS_00004165 | TCONS_00003564 |
| TCONS_00028097 | TCONS_00004224 | TCONS_00019360 |
| TCONS_00027705 | TCONS_00004236 | TCONS_00022085 |
| TCONS_00027703 | TCONS_00004245 | TCONS_00014720 |
| TCONS_00027655 | TCONS_00004246 | TCONS_00013800 |
| TCONS_00027643 | TCONS_00029696 | TCONS_00029279 |
| TCONS_00027629 | TCONS_00004364 | TCONS_00004782 |
| TCONS_00027620 | TCONS_00004374 | TCONS_00004838 |
| TCONS_00027618 | TCONS_00004409 | TCONS_00004374 |
| TCONS_00027590 | TCONS_00004420 | TCONS_00024099 |
| TCONS_00027589 | TCONS_00004462 | TCONS_00018950 |

|                |                |                |
|----------------|----------------|----------------|
| TCONS_00027578 | TCONS_00004489 | TCONS_00019908 |
| TCONS_00027517 | TCONS_00004532 | TCONS_00001810 |
| TCONS_00027473 | TCONS_00004619 | TCONS_00029027 |
| TCONS_00027397 | TCONS_00004621 | TCONS_00015020 |
| TCONS_00027384 | TCONS_00004623 | TCONS_00022768 |
| TCONS_00027289 | TCONS_00004655 | TCONS_00005168 |
| TCONS_00027288 | TCONS_00004671 | TCONS_00026326 |
| TCONS_00027248 | TCONS_00004782 | TCONS_00012717 |
| TCONS_00027203 | TCONS_00004838 | TCONS_00004015 |
| TCONS_00027180 | TCONS_00004875 | TCONS_00010337 |
| TCONS_00027165 | TCONS_00004878 | TCONS_00004224 |
| TCONS_00027078 | TCONS_00004912 | TCONS_00013743 |
| TCONS_00026996 | TCONS_00004944 | TCONS_00013658 |
| TCONS_00026991 | TCONS_00004986 | TCONS_00011511 |
| TCONS_00026989 | TCONS_00005041 | TCONS_00011104 |
| TCONS_00026944 | TCONS_00005049 | TCONS_00013288 |
| TCONS_00026908 | TCONS_00005168 | TCONS_00023844 |
| TCONS_00026905 | TCONS_00005192 | TCONS_00008899 |
| TCONS_00026882 | TCONS_00005314 | TCONS_00022899 |
| TCONS_00026840 | TCONS_00005948 | TCONS_00024536 |
| TCONS_00026835 | TCONS_00005953 | TCONS_00006482 |
| TCONS_00026830 | TCONS_00005990 | TCONS_00017355 |
| TCONS_00026823 | TCONS_00006001 | TCONS_00021091 |
| TCONS_00026598 | TCONS_00006013 | TCONS_00006440 |
| TCONS_00026565 | TCONS_00006033 | TCONS_00002094 |
| TCONS_00026520 | TCONS_00006093 | TCONS_00004944 |
| TCONS_00026503 | TCONS_00006100 | TCONS_00010170 |
| TCONS_00026469 | TCONS_00006101 | TCONS_00025084 |
| TCONS_00026398 | TCONS_00006148 | TCONS_00015943 |
| TCONS_00026396 | TCONS_00006193 | TCONS_00018097 |
| TCONS_00026394 | TCONS_00006194 | TCONS_00013496 |
| TCONS_00026383 | TCONS_00006200 | TCONS_00008433 |
| TCONS_00026380 | TCONS_00006206 | TCONS_00019756 |
| TCONS_00026369 | TCONS_00006223 | TCONS_00013565 |
| TCONS_00026366 | TCONS_00006285 | TCONS_00009873 |
| TCONS_00026340 | TCONS_00006338 | TCONS_00025321 |
| TCONS_00026327 | TCONS_00006344 | TCONS_00013408 |
| TCONS_00026326 | TCONS_00006440 | TCONS_00016901 |
| TCONS_00026245 | TCONS_00006482 | TCONS_00006101 |
| TCONS_00026236 | TCONS_00006483 | TCONS_00002580 |
| TCONS_00026229 | TCONS_00006498 | TCONS_00027397 |
| TCONS_00026227 | TCONS_00006514 | TCONS_00018739 |
| TCONS_00026215 | TCONS_00006601 | TCONS_00001368 |

|                |                |                |
|----------------|----------------|----------------|
| TCONS_00025860 | TCONS_00006619 | TCONS_00019246 |
| TCONS_00025784 | TCONS_00006678 | TCONS_00009003 |
| TCONS_00025773 | TCONS_00006717 | TCONS_00004462 |
| TCONS_00025770 | TCONS_00006776 | TCONS_00005192 |
| TCONS_00025738 | TCONS_00006792 | TCONS_00016144 |
| TCONS_00025731 | TCONS_00006822 | TCONS_00009836 |
| TCONS_00025723 | TCONS_00007011 | TCONS_00013649 |
| TCONS_00025700 | TCONS_00007264 | TCONS_00027078 |
| TCONS_00025612 | TCONS_00007280 | TCONS_00018995 |
| TCONS_00025611 | TCONS_00007281 | TCONS_00016825 |
| TCONS_00025591 | TCONS_00007459 | TCONS_00007280 |
| TCONS_00025556 | TCONS_00007951 | TCONS_00022597 |
| TCONS_00025553 | TCONS_00007954 | TCONS_00023655 |
| TCONS_00025531 | TCONS_00007959 | TCONS_00027620 |
| TCONS_00025513 | TCONS_00007979 | TCONS_00027655 |
| TCONS_00025508 | TCONS_00008111 | TCONS_00027618 |
| TCONS_00025506 | TCONS_00008153 | TCONS_00011107 |
| TCONS_00025505 | TCONS_00008211 | TCONS_00022896 |
| TCONS_00025498 | TCONS_00008217 | TCONS_00015131 |
| TCONS_00025483 | TCONS_00008415 | TCONS_00013316 |
| TCONS_00025472 | TCONS_00008433 | TCONS_00011978 |
| TCONS_00025471 | TCONS_00008503 | TCONS_00021993 |
| TCONS_00025441 | TCONS_00008529 | TCONS_00019909 |
| TCONS_00025420 | TCONS_00008592 | TCONS_00002290 |
| TCONS_00025402 | TCONS_00008621 | TCONS_00023722 |
| TCONS_00025386 | TCONS_00008642 | TCONS_00010156 |
| TCONS_00025370 | TCONS_00008698 | TCONS_00000864 |
| TCONS_00025369 | TCONS_00008729 | TCONS_00029895 |
| TCONS_00025361 | TCONS_00008740 | TCONS_00028131 |
| TCONS_00025353 | TCONS_00008769 | TCONS_00026383 |
| TCONS_00025333 | TCONS_00008869 | TCONS_00028191 |
| TCONS_00025321 | TCONS_00008899 | TCONS_00004000 |
| TCONS_00025299 | TCONS_00008904 | TCONS_00006483 |
| TCONS_00025256 | TCONS_00008927 | TCONS_00004532 |
| TCONS_00025234 | TCONS_00009003 | TCONS_00011228 |
| TCONS_00025223 | TCONS_00009166 | TCONS_00027578 |
| TCONS_00025221 | TCONS_00009184 | TCONS_00029696 |
| TCONS_00025086 | TCONS_00009756 | TCONS_00007954 |
| TCONS_00025085 | TCONS_00009823 | TCONS_00006206 |
| TCONS_00025084 | TCONS_00009836 | TCONS_00025076 |
| TCONS_00025076 | TCONS_00009849 | TCONS_00001483 |
| TCONS_00025036 | TCONS_00009873 | TCONS_00006200 |
| TCONS_00025035 | TCONS_00010001 | TCONS_00006148 |

|                |                |                |
|----------------|----------------|----------------|
| TCONS_00024897 | TCONS_00010083 | TCONS_00022028 |
| TCONS_00024814 | TCONS_00010145 | TCONS_00019627 |
| TCONS_00024785 | TCONS_00010156 | TCONS_00007951 |
| TCONS_00024783 | TCONS_00010169 | TCONS_00003970 |
| TCONS_00024777 | TCONS_00010170 | TCONS_00025361 |
| TCONS_00024757 | TCONS_00010209 | TCONS_00012412 |
| TCONS_00024730 | TCONS_00010217 | TCONS_00023296 |
| TCONS_00024718 | TCONS_00010313 | TCONS_00005948 |
| TCONS_00024701 | TCONS_00010337 | TCONS_00023840 |
| TCONS_00024666 | TCONS_00010341 | TCONS_00015144 |
| TCONS_00024645 | TCONS_00010379 | TCONS_00001737 |
| TCONS_00024643 | TCONS_00010521 | TCONS_00018703 |
| TCONS_00024547 | TCONS_00010552 | TCONS_00020516 |
| TCONS_00024536 | TCONS_00010558 | TCONS_00001814 |
| TCONS_00024503 | TCONS_00010587 | TCONS_00022773 |
| TCONS_00024491 | TCONS_00010663 | TCONS_00008729 |
| TCONS_00024486 | TCONS_00010743 | TCONS_00010521 |
| TCONS_00024467 | TCONS_00010790 | TCONS_00017362 |
| TCONS_00024450 | TCONS_00010792 | TCONS_00004655 |
| TCONS_00024449 | TCONS_00010794 | TCONS_00001243 |
| TCONS_00024430 | TCONS_00010838 | TCONS_00029615 |
| TCONS_00024429 | TCONS_00010873 | TCONS_00006498 |
| TCONS_00024360 | TCONS_00010945 | TCONS_00025234 |
| TCONS_00024342 | TCONS_00010980 | TCONS_00004033 |
| TCONS_00024310 | TCONS_00011083 | TCONS_00028725 |
| TCONS_00024152 | TCONS_00011088 | TCONS_00013427 |
| TCONS_00024147 | TCONS_00011104 | TCONS_00010379 |
| TCONS_00024123 | TCONS_00011107 | TCONS_00018746 |
| TCONS_00024099 | TCONS_00011228 | TCONS_00007459 |
| TCONS_00024073 | TCONS_00011511 | TCONS_00021905 |
| TCONS_00024026 | TCONS_00011672 | TCONS_00018949 |
| TCONS_00024014 | TCONS_00011673 | TCONS_00029727 |
| TCONS_00023891 | TCONS_00011706 | TCONS_00014446 |
| TCONS_00023844 | TCONS_00011731 | TCONS_00001418 |
| TCONS_00023840 | TCONS_00011746 | TCONS_00021222 |
| TCONS_00023839 | TCONS_00011779 | TCONS_00004409 |
| TCONS_00023826 | TCONS_00011799 | TCONS_00004619 |
| TCONS_00023742 | TCONS_00011805 | TCONS_00025770 |
| TCONS_00023741 | TCONS_00011842 | TCONS_00021014 |
| TCONS_00023722 | TCONS_00011962 |                |
| TCONS_00023717 | TCONS_00011978 |                |

|                |                |
|----------------|----------------|
| TCONS_00023714 | TCONS_00011987 |
| TCONS_00023697 | TCONS_00012024 |
| TCONS_00023655 | TCONS_00012030 |
| TCONS_00023648 | TCONS_00012062 |
| TCONS_00023647 | TCONS_00012176 |
| TCONS_00023595 | TCONS_00012208 |
| TCONS_00023574 | TCONS_00012347 |
| TCONS_00023563 | TCONS_00012377 |
| TCONS_00023559 | TCONS_00012412 |
| TCONS_00023557 | TCONS_00012530 |
| TCONS_00023538 | TCONS_00012608 |
| TCONS_00023502 | TCONS_00012628 |
| TCONS_00023486 | TCONS_00012630 |
| TCONS_00023477 | TCONS_00012717 |
| TCONS_00023453 | TCONS_00012833 |
| TCONS_00023440 | TCONS_00013103 |
| TCONS_00023343 | TCONS_00013288 |
| TCONS_00023300 | TCONS_00013316 |
| TCONS_00023298 | TCONS_00029727 |
| TCONS_00023296 | TCONS_00013408 |
| TCONS_00023278 | TCONS_00013414 |
| TCONS_00023265 | TCONS_00013427 |

|                |                |
|----------------|----------------|
| TCONS_00023134 | TCONS_00013496 |
| TCONS_00023109 | TCONS_00013565 |
| TCONS_00023094 | TCONS_00013584 |
| TCONS_00023087 | TCONS_00013590 |
| TCONS_00000848 | TCONS_00013642 |
| TCONS_00023044 | TCONS_00013645 |
| TCONS_00023029 | TCONS_00013649 |
| TCONS_00023013 | TCONS_00013658 |
| TCONS_00022975 | TCONS_00013713 |
| TCONS_00022899 | TCONS_00013741 |
| TCONS_00022896 | TCONS_00013742 |
| TCONS_00022885 | TCONS_00013743 |
| TCONS_00022884 | TCONS_00013784 |
| TCONS_00022882 | TCONS_00013800 |
| TCONS_00022869 | TCONS_00013809 |
| TCONS_00022841 | TCONS_00013864 |
| TCONS_00022775 | TCONS_00013948 |
| TCONS_00022773 | TCONS_00013978 |
| TCONS_00022768 | TCONS_00013993 |
| TCONS_00022745 | TCONS_00013995 |
| TCONS_00022707 | TCONS_00014014 |
| TCONS_00022691 | TCONS_00014018 |

|                |                |
|----------------|----------------|
| TCONS_00022690 | TCONS_00014020 |
| TCONS_00022688 | TCONS_00014043 |
| TCONS_00022629 | TCONS_00014248 |
| TCONS_00022597 | TCONS_00014425 |
| TCONS_00022481 | TCONS_00014446 |
| TCONS_00022310 | TCONS_00014447 |
| TCONS_00022272 | TCONS_00014543 |
| TCONS_00022239 | TCONS_00014578 |
| TCONS_00022237 | TCONS_00014625 |
| TCONS_00022208 | TCONS_00014627 |
| TCONS_00022157 | TCONS_00014652 |
| TCONS_00022143 | TCONS_00014720 |
| TCONS_00022089 | TCONS_00014761 |
| TCONS_00022087 | TCONS_00014872 |
| TCONS_00022085 | TCONS_00014933 |
| TCONS_00022029 | TCONS_00014980 |
| TCONS_00022028 | TCONS_00015020 |
| TCONS_00022027 | TCONS_00015092 |
| TCONS_00022026 | TCONS_00015107 |
| TCONS_00022004 | TCONS_00015131 |
| TCONS_00021993 | TCONS_00015143 |
| TCONS_00021991 | TCONS_00015144 |



|                |                |
|----------------|----------------|
| TCONS_00021985 | TCONS_00015150 |
| TCONS_00021981 | TCONS_00015176 |
| TCONS_00021976 | TCONS_00015178 |
| TCONS_00021919 | TCONS_00015270 |
| TCONS_00021915 | TCONS_00015305 |
| TCONS_00021905 | TCONS_00015306 |
| TCONS_00021899 | TCONS_00015375 |
| TCONS_00021888 | TCONS_00015399 |
| TCONS_00021867 | TCONS_00015456 |
| TCONS_00021852 | TCONS_00015901 |
| TCONS_00021785 | TCONS_00015908 |
| TCONS_00021771 | TCONS_00015939 |
| TCONS_00021748 | TCONS_00015943 |
| TCONS_00021744 | TCONS_00016018 |
| TCONS_00021731 | TCONS_00016036 |
| TCONS_00021716 | TCONS_00016047 |
| TCONS_00021454 | TCONS_00016116 |
| TCONS_00021393 | TCONS_00016120 |
| TCONS_00021327 | TCONS_00016122 |
| TCONS_00021310 | TCONS_00016132 |
| TCONS_00021260 | TCONS_00016144 |
| TCONS_00000841 | TCONS_00016155 |

|                |                |
|----------------|----------------|
| TCONS_00021222 | TCONS_00016200 |
| TCONS_00021176 | TCONS_00016209 |
| TCONS_00021139 | TCONS_00016212 |
| TCONS_00021138 | TCONS_00016246 |
| TCONS_00021091 | TCONS_00016264 |
| TCONS_00021032 | TCONS_00016438 |
| TCONS_00021014 | TCONS_00016509 |
| TCONS_00020998 | TCONS_00016693 |
| TCONS_00020996 | TCONS_00016752 |
| TCONS_00020994 | TCONS_00016825 |
| TCONS_00020947 | TCONS_00016890 |
| TCONS_00020938 | TCONS_00016896 |
| TCONS_00020916 | TCONS_00016901 |
| TCONS_00020888 | TCONS_00017181 |
| TCONS_00020870 | TCONS_00017307 |
| TCONS_00020869 | TCONS_00017353 |
| TCONS_00020843 | TCONS_00017355 |
| TCONS_00020765 | TCONS_00017356 |
| TCONS_00020752 | TCONS_00017362 |
| TCONS_00020708 | TCONS_00017365 |
| TCONS_00020694 | TCONS_00017449 |
| TCONS_00020692 | TCONS_00017457 |

|                |                |
|----------------|----------------|
| TCONS_00020680 | TCONS_00017488 |
| TCONS_00020654 | TCONS_00018086 |
| TCONS_00020613 | TCONS_00018089 |
| TCONS_00020575 | TCONS_00018097 |
| TCONS_00020516 | TCONS_00018118 |
| TCONS_00020509 | TCONS_00018127 |
| TCONS_00020477 | TCONS_00018143 |
| TCONS_00020475 | TCONS_00018191 |
| TCONS_00020450 | TCONS_00018229 |
| TCONS_00020446 | TCONS_00018319 |
| TCONS_00020439 | TCONS_00018340 |
| TCONS_00020407 | TCONS_00018344 |
| TCONS_00020140 | TCONS_00018445 |
| TCONS_00020124 | TCONS_00018527 |
| TCONS_00020083 | TCONS_00018569 |
| TCONS_00020046 | TCONS_00018590 |
| TCONS_00020022 | TCONS_00018621 |
| TCONS_00019973 | TCONS_00018637 |
| TCONS_00019909 | TCONS_00018642 |
| TCONS_00019908 | TCONS_00018648 |
| TCONS_00019861 | TCONS_00018657 |
| TCONS_00019808 | TCONS_00018703 |

|                |                |
|----------------|----------------|
| TCONS_00019807 | TCONS_00018739 |
| TCONS_00019803 | TCONS_00018746 |
| TCONS_00019800 | TCONS_00018839 |
| TCONS_00019777 | TCONS_00018868 |
| TCONS_00019756 | TCONS_00018873 |
| TCONS_00019755 | TCONS_00018949 |
| TCONS_00019744 | TCONS_00018950 |
| TCONS_00019734 | TCONS_00018986 |
| TCONS_00019733 | TCONS_00018995 |
| TCONS_00019731 | TCONS_00019038 |
| TCONS_00019699 | TCONS_00019182 |
| TCONS_00019667 | TCONS_00019201 |
| TCONS_00019666 | TCONS_00019246 |
| TCONS_00019665 | TCONS_00019257 |
| TCONS_00019646 | TCONS_00019285 |
| TCONS_00019645 | TCONS_00019360 |
| TCONS_00019636 | TCONS_00019476 |
| TCONS_00019627 | TCONS_00019540 |
| TCONS_00019626 | TCONS_00029778 |
| TCONS_00019608 | TCONS_00019585 |
| TCONS_00019601 | TCONS_00019599 |
| TCONS_00019585 | TCONS_00019627 |

|                |                |
|----------------|----------------|
| TCONS_00000796 | TCONS_00019666 |
| TCONS_00019525 | TCONS_00019735 |
| TCONS_00019512 | TCONS_00019740 |
| TCONS_00019505 | TCONS_00019741 |
| TCONS_00019504 | TCONS_00019756 |
| TCONS_00019503 | TCONS_00019786 |
| TCONS_00019502 | TCONS_00019787 |
| TCONS_00019479 | TCONS_00019806 |
| TCONS_00019478 | TCONS_00019908 |
| TCONS_00019461 | TCONS_00019909 |
| TCONS_00019400 | TCONS_00019914 |
| TCONS_00019384 | TCONS_00020145 |
| TCONS_00019371 | TCONS_00020516 |
| TCONS_00019367 | TCONS_00020578 |
| TCONS_00019361 | TCONS_00020615 |
| TCONS_00019360 | TCONS_00020732 |
| TCONS_00019358 | TCONS_00020779 |
| TCONS_00019314 | TCONS_00020807 |
| TCONS_00019285 | TCONS_00020857 |
| TCONS_00019259 | TCONS_00020865 |
| TCONS_00019257 | TCONS_00020994 |
| TCONS_00019246 | TCONS_00021005 |

|                |                |
|----------------|----------------|
| TCONS_00019244 | TCONS_00021014 |
| TCONS_00019151 | TCONS_00021091 |
| TCONS_00019053 | TCONS_00021221 |
| TCONS_00019032 | TCONS_00021222 |
| TCONS_00019012 | TCONS_00029887 |
| TCONS_00018995 | TCONS_00021505 |
| TCONS_00018950 | TCONS_00021656 |
| TCONS_00018949 | TCONS_00021735 |
| TCONS_00018849 | TCONS_00021760 |
| TCONS_00018847 | TCONS_00021761 |
| TCONS_00018841 | TCONS_00021852 |
| TCONS_00018839 | TCONS_00021878 |
| TCONS_00018838 | TCONS_00021905 |
| TCONS_00018746 | TCONS_00021940 |
| TCONS_00018739 | TCONS_00021967 |
| TCONS_00018703 | TCONS_00021973 |
| TCONS_00018685 | TCONS_00021993 |
| TCONS_00018649 | TCONS_00022027 |
| TCONS_00018648 | TCONS_00022028 |
| TCONS_00018621 | TCONS_00022032 |
| TCONS_00018618 | TCONS_00022053 |
| TCONS_00018589 | TCONS_00022085 |

|                |                |
|----------------|----------------|
| TCONS_00018588 | TCONS_00022086 |
| TCONS_00018558 | TCONS_00022087 |
| TCONS_00018537 | TCONS_00022273 |
| TCONS_00018527 | TCONS_00022439 |
| TCONS_00018503 | TCONS_00022469 |
| TCONS_00018502 | TCONS_00022597 |
| TCONS_00018499 | TCONS_00022675 |
| TCONS_00018496 | TCONS_00022685 |
| TCONS_00018461 | TCONS_00022768 |
| TCONS_00018456 | TCONS_00022773 |
| TCONS_00018410 | TCONS_00022841 |
| TCONS_00018409 | TCONS_00022844 |
| TCONS_00018406 | TCONS_00022896 |
| TCONS_00018396 | TCONS_00022898 |
| TCONS_00018394 | TCONS_00022899 |
| TCONS_00018380 | TCONS_00022972 |
| TCONS_00018379 | TCONS_00029895 |
| TCONS_00018343 | TCONS_00023094 |
| TCONS_00018340 | TCONS_00023134 |
| TCONS_00018337 | TCONS_00023296 |
| TCONS_00018333 | TCONS_00023310 |
| TCONS_00018324 | TCONS_00023502 |

|                |                |
|----------------|----------------|
| TCONS_00018285 | TCONS_00023648 |
| TCONS_00018282 | TCONS_00023655 |
| TCONS_00018266 | TCONS_00023686 |
| TCONS_00018256 | TCONS_00023722 |
| TCONS_00018255 | TCONS_00023745 |
| TCONS_00018195 | TCONS_00023840 |
| TCONS_00018191 | TCONS_00023844 |
| TCONS_00018164 | TCONS_00023868 |
| TCONS_00018162 | TCONS_00024016 |
| TCONS_00018151 | TCONS_00024073 |
| TCONS_00018150 | TCONS_00024099 |
| TCONS_00018142 | TCONS_00024294 |
| TCONS_00018141 | TCONS_00024360 |
| TCONS_00018138 | TCONS_00024450 |
| TCONS_00018127 | TCONS_00024738 |
| TCONS_00018121 | TCONS_00024761 |
| TCONS_00018120 | TCONS_00025076 |
| TCONS_00018097 | TCONS_00025079 |
| TCONS_00018089 | TCONS_00025082 |
| TCONS_00018077 | TCONS_00025084 |
| TCONS_00017723 | TCONS_00025221 |
| TCONS_00017629 | TCONS_00025234 |



|                |                |
|----------------|----------------|
| TCONS_00017618 | TCONS_00025258 |
| TCONS_00017518 | TCONS_00025308 |
| TCONS_00017499 | TCONS_00025321 |
| TCONS_00017426 | TCONS_00025337 |
| TCONS_00017392 | TCONS_00025361 |
| TCONS_00017379 | TCONS_00025483 |
| TCONS_00017369 | TCONS_00025501 |
| TCONS_00017365 | TCONS_00025721 |
| TCONS_00017362 | TCONS_00025770 |
| TCONS_00017355 | TCONS_00025772 |
| TCONS_00017354 | TCONS_00025982 |
| TCONS_00017347 | TCONS_00026002 |
| TCONS_00017336 | TCONS_00026236 |
| TCONS_00017335 | TCONS_00026276 |
| TCONS_00017288 | TCONS_00026289 |
| TCONS_00017281 | TCONS_00026319 |
| TCONS_00017254 | TCONS_00026326 |
| TCONS_00017250 | TCONS_00026340 |
| TCONS_00017228 | TCONS_00026366 |
| TCONS_00017226 | TCONS_00026383 |
| TCONS_00017209 | TCONS_00026423 |
| TCONS_00017192 | TCONS_00026461 |

|                |                |
|----------------|----------------|
| TCONS_00017189 | TCONS_00026520 |
| TCONS_00017157 | TCONS_00026539 |
| TCONS_00016903 | TCONS_00026566 |
| TCONS_00016902 | TCONS_00026628 |
| TCONS_00016901 | TCONS_00026678 |
| TCONS_00016899 | TCONS_00026959 |
| TCONS_00016897 | TCONS_00026960 |
| TCONS_00016895 | TCONS_00026982 |
| TCONS_00016894 | TCONS_00026991 |
| TCONS_00016825 | TCONS_00026992 |
| TCONS_00016668 | TCONS_00027078 |
| TCONS_00016666 | TCONS_00027083 |
| TCONS_00016665 | TCONS_00027229 |
| TCONS_00016652 | TCONS_00027312 |
| TCONS_00016651 | TCONS_00027380 |
| TCONS_00016637 | TCONS_00027397 |
| TCONS_00016575 | TCONS_00027511 |
| TCONS_00016514 | TCONS_00027517 |
| TCONS_00016512 | TCONS_00027578 |
| TCONS_00016508 | TCONS_00027618 |
| TCONS_00016507 | TCONS_00027620 |
| TCONS_00016498 | TCONS_00027621 |

|                |                |
|----------------|----------------|
| TCONS_00016496 | TCONS_00027655 |
| TCONS_00016492 | TCONS_00028112 |
| TCONS_00016482 | TCONS_00028117 |
| TCONS_00016477 | TCONS_00028118 |
| TCONS_00016434 | TCONS_00028131 |
| TCONS_00016402 | TCONS_00028137 |
| TCONS_00016398 | TCONS_00028173 |
| TCONS_00016391 | TCONS_00028191 |
| TCONS_00016378 | TCONS_00028193 |
| TCONS_00016355 | TCONS_00028196 |
| TCONS_00016316 | TCONS_00028226 |
| TCONS_00016312 | TCONS_00028254 |
| TCONS_00016289 | TCONS_00028271 |
| TCONS_00016266 | TCONS_00028278 |
| TCONS_00016233 | TCONS_00028307 |
| TCONS_00016231 | TCONS_00028366 |
| TCONS_00016214 | TCONS_00013003 |
| TCONS_00016162 | TCONS_00028435 |
| TCONS_00016160 | TCONS_00028444 |
| TCONS_00016158 | TCONS_00028450 |
| TCONS_00016151 | TCONS_00028455 |
| TCONS_00016144 | TCONS_00028548 |

|                |                |
|----------------|----------------|
| TCONS_00016140 | TCONS_00028559 |
| TCONS_00016129 | TCONS_00028564 |
| TCONS_00016124 | TCONS_00028573 |
| TCONS_00016122 | TCONS_00028725 |
| TCONS_00016118 | TCONS_00028850 |
| TCONS_00016098 | TCONS_00028986 |
| TCONS_00016089 | TCONS_00028991 |
| TCONS_00016088 | TCONS_00029004 |
| TCONS_00016073 | TCONS_00029027 |
| TCONS_00016056 | TCONS_00029029 |
| TCONS_00016034 | TCONS_00029061 |
| TCONS_00016002 | TCONS_00029173 |
| TCONS_00015968 | TCONS_00029181 |
| TCONS_00015945 | TCONS_00029252 |
| TCONS_00015943 | TCONS_00029279 |
| TCONS_00015940 | TCONS_00029500 |
| TCONS_00015932 | TCONS_00029529 |
| TCONS_00015915 | TCONS_00029531 |
| TCONS_00015906 | TCONS_00029615 |
| TCONS_00015903 | TCONS_00029616 |
| TCONS_00015375 | TCONS_00024536 |
| TCONS_00015306 | TCONS_00000864 |

|                |
|----------------|
| TCONS_00015305 |
| TCONS_00015260 |
| TCONS_00015176 |
| TCONS_00015171 |
| TCONS_00015154 |
| TCONS_00015144 |
| TCONS_00015131 |
| TCONS_00015126 |
| TCONS_00015107 |
| TCONS_00015038 |
| TCONS_00015028 |
| TCONS_00015025 |
| TCONS_00015020 |
| TCONS_00014948 |
| TCONS_00014884 |
| TCONS_00014880 |
| TCONS_00014876 |
| TCONS_00014874 |
| TCONS_00014873 |
| TCONS_00014836 |
| TCONS_00014831 |
| TCONS_00014810 |

|                |
|----------------|
| TCONS_00014805 |
| TCONS_00014801 |
| TCONS_00014788 |
| TCONS_00014782 |
| TCONS_00014763 |
| TCONS_00014758 |
| TCONS_00014747 |
| TCONS_00014741 |
| TCONS_00014730 |
| TCONS_00014720 |
| TCONS_00014664 |
| TCONS_00014652 |
| TCONS_00014648 |
| TCONS_00014647 |
| TCONS_00014617 |
| TCONS_00014616 |
| TCONS_00014603 |
| TCONS_00014557 |
| TCONS_00014460 |
| TCONS_00014459 |
| TCONS_00014446 |
| TCONS_00014353 |

|                |
|----------------|
| TCONS_00014341 |
| TCONS_00014311 |
| TCONS_00014235 |
| TCONS_00014231 |
| TCONS_00014225 |
| TCONS_00014197 |
| TCONS_00014195 |
| TCONS_00014180 |
| TCONS_00014153 |
| TCONS_00014135 |
| TCONS_00014134 |
| TCONS_00014015 |
| TCONS_00014012 |
| TCONS_00014004 |
| TCONS_00013993 |
| TCONS_00013985 |
| TCONS_00013984 |
| TCONS_00013975 |
| TCONS_00013953 |
| TCONS_00013943 |
| TCONS_00013937 |
| TCONS_00013820 |

|                |
|----------------|
| TCONS_00013806 |
| TCONS_00013800 |
| TCONS_00013799 |
| TCONS_00013783 |
| TCONS_00013776 |
| TCONS_00013775 |
| TCONS_00013744 |
| TCONS_00013743 |
| TCONS_00013741 |
| TCONS_00013739 |
| TCONS_00013730 |
| TCONS_00013729 |
| TCONS_00013713 |
| TCONS_00013699 |
| TCONS_00013658 |
| TCONS_00013653 |
| TCONS_00013649 |
| TCONS_00013647 |
| TCONS_00013628 |
| TCONS_00013619 |
| TCONS_00013616 |
| TCONS_00013590 |



|                |
|----------------|
| TCONS_00013573 |
| TCONS_00013565 |
| TCONS_00013557 |
| TCONS_00013555 |
| TCONS_00013554 |
| TCONS_00013542 |
| TCONS_00013540 |
| TCONS_00013539 |
| TCONS_00013496 |
| TCONS_00013473 |
| TCONS_00013427 |
| TCONS_00013408 |
| TCONS_00013397 |
| TCONS_00000506 |
| TCONS_00013320 |
| TCONS_00013316 |
| TCONS_00013288 |
| TCONS_00013188 |
| TCONS_00013058 |
| TCONS_00013003 |
| TCONS_00012989 |
| TCONS_00012836 |

|                |
|----------------|
| TCONS_00012717 |
| TCONS_00012649 |
| TCONS_00012632 |
| TCONS_00012630 |
| TCONS_00012628 |
| TCONS_00012620 |
| TCONS_00012612 |
| TCONS_00012606 |
| TCONS_00012569 |
| TCONS_00012535 |
| TCONS_00012533 |
| TCONS_00012453 |
| TCONS_00012412 |
| TCONS_00012372 |
| TCONS_00012370 |
| TCONS_00012359 |
| TCONS_00012350 |
| TCONS_00012346 |
| TCONS_00012342 |
| TCONS_00012337 |
| TCONS_00012335 |
| TCONS_00012278 |

|                |
|----------------|
| TCONS_00012249 |
| TCONS_00012247 |
| TCONS_00012237 |
| TCONS_00012230 |
| TCONS_00012219 |
| TCONS_00012127 |
| TCONS_00012114 |
| TCONS_00012100 |
| TCONS_00012092 |
| TCONS_00012089 |
| TCONS_00012071 |
| TCONS_00012070 |
| TCONS_00012069 |
| TCONS_00012067 |
| TCONS_00012060 |
| TCONS_00012055 |
| TCONS_00012054 |
| TCONS_00012047 |
| TCONS_00012035 |
| TCONS_00012032 |
| TCONS_00012030 |
| TCONS_00012018 |

|                |
|----------------|
| TCONS_00011997 |
| TCONS_00011985 |
| TCONS_00011980 |
| TCONS_00011979 |
| TCONS_00011978 |
| TCONS_00011965 |
| TCONS_00011964 |
| TCONS_00011963 |
| TCONS_00011816 |
| TCONS_00011810 |
| TCONS_00011760 |
| TCONS_00011758 |
| TCONS_00011753 |
| TCONS_00011749 |
| TCONS_00011747 |
| TCONS_00011710 |
| TCONS_00011706 |
| TCONS_00011672 |
| TCONS_00011665 |
| TCONS_00011649 |
| TCONS_00011630 |
| TCONS_00011511 |

|                |
|----------------|
| TCONS_00011442 |
| TCONS_00011296 |
| TCONS_00011248 |
| TCONS_00011228 |
| TCONS_00011107 |
| TCONS_00011104 |
| TCONS_00011098 |
| TCONS_00011070 |
| TCONS_00011030 |
| TCONS_00010992 |
| TCONS_00010945 |
| TCONS_00010920 |
| TCONS_00010919 |
| TCONS_00010872 |
| TCONS_00010856 |
| TCONS_00010854 |
| TCONS_00010837 |
| TCONS_00010823 |
| TCONS_00010794 |
| TCONS_00010792 |
| TCONS_00010774 |
| TCONS_00010756 |

|                |
|----------------|
| TCONS_00010749 |
| TCONS_00010726 |
| TCONS_00010716 |
| TCONS_00010614 |
| TCONS_00010607 |
| TCONS_00010606 |
| TCONS_00010597 |
| TCONS_00010584 |
| TCONS_00010556 |
| TCONS_00010555 |
| TCONS_00010526 |
| TCONS_00010521 |
| TCONS_00010470 |
| TCONS_00010379 |
| TCONS_00010374 |
| TCONS_00010357 |
| TCONS_00010352 |
| TCONS_00010337 |
| TCONS_00010334 |
| TCONS_00010304 |
| TCONS_00010294 |
| TCONS_00010227 |

|                |
|----------------|
| TCONS_00010179 |
| TCONS_00010170 |
| TCONS_00010167 |
| TCONS_00010156 |
| TCONS_00010118 |
| TCONS_00010106 |
| TCONS_00010076 |
| TCONS_00010062 |
| TCONS_00010009 |
| TCONS_00009956 |
| TCONS_00009935 |
| TCONS_00009873 |
| TCONS_00009862 |
| TCONS_00009857 |
| TCONS_00009849 |
| TCONS_00009847 |
| TCONS_00009842 |
| TCONS_00009836 |
| TCONS_00009190 |
| TCONS_00009183 |
| TCONS_00009182 |
| TCONS_00009133 |

|                |
|----------------|
| TCONS_00009112 |
| TCONS_00009013 |
| TCONS_00009003 |
| TCONS_00008978 |
| TCONS_00008950 |
| TCONS_00008931 |
| TCONS_00008899 |
| TCONS_00008798 |
| TCONS_00008739 |
| TCONS_00008738 |
| TCONS_00008729 |
| TCONS_00008727 |
| TCONS_00008726 |
| TCONS_00008682 |
| TCONS_00008681 |
| TCONS_00008680 |
| TCONS_00008650 |
| TCONS_00008646 |
| TCONS_00008645 |
| TCONS_00008631 |
| TCONS_00008628 |
| TCONS_00008622 |



|                |
|----------------|
| TCONS_00008562 |
| TCONS_00008503 |
| TCONS_00008465 |
| TCONS_00008464 |
| TCONS_00008449 |
| TCONS_00008434 |
| TCONS_00008433 |
| TCONS_00008336 |
| TCONS_00008324 |
| TCONS_00008309 |
| TCONS_00008282 |
| TCONS_00008216 |
| TCONS_00008199 |
| TCONS_00008170 |
| TCONS_00008143 |
| TCONS_00008138 |
| TCONS_00008058 |
| TCONS_00007998 |
| TCONS_00007979 |
| TCONS_00007959 |
| TCONS_00007958 |
| TCONS_00007954 |

|                |
|----------------|
| TCONS_00007953 |
| TCONS_00007951 |
| TCONS_00007948 |
| TCONS_00007945 |
| TCONS_00007884 |
| TCONS_00007688 |
| TCONS_00007603 |
| TCONS_00007459 |
| TCONS_00007282 |
| TCONS_00007280 |
| TCONS_00007278 |
| TCONS_00007270 |
| TCONS_00007264 |
| TCONS_00007245 |
| TCONS_00007244 |
| TCONS_00007180 |
| TCONS_00007119 |
| TCONS_00007063 |
| TCONS_00007015 |
| TCONS_00007014 |
| TCONS_00007010 |
| TCONS_00006925 |

|                |
|----------------|
| TCONS_00006865 |
| TCONS_00006820 |
| TCONS_00006792 |
| TCONS_00006773 |
| TCONS_00006771 |
| TCONS_00006707 |
| TCONS_00006675 |
| TCONS_00006668 |
| TCONS_00006636 |
| TCONS_00006603 |
| TCONS_00006562 |
| TCONS_00006552 |
| TCONS_00006534 |
| TCONS_00006525 |
| TCONS_00006505 |
| TCONS_00006498 |
| TCONS_00006483 |
| TCONS_00006482 |
| TCONS_00006454 |
| TCONS_00006442 |
| TCONS_00006440 |
| TCONS_00006387 |

|                |
|----------------|
| TCONS_00006372 |
| TCONS_00006371 |
| TCONS_00006356 |
| TCONS_00006340 |
| TCONS_00006334 |
| TCONS_00006332 |
| TCONS_00006331 |
| TCONS_00006278 |
| TCONS_00006247 |
| TCONS_00006219 |
| TCONS_00006206 |
| TCONS_00006200 |
| TCONS_00006193 |
| TCONS_00006148 |
| TCONS_00006132 |
| TCONS_00006131 |
| TCONS_00006101 |
| TCONS_00006085 |
| TCONS_00006036 |
| TCONS_00006023 |
| TCONS_00005992 |
| TCONS_00005965 |

|                |
|----------------|
| TCONS_00005948 |
| TCONS_00005947 |
| TCONS_00005946 |
| TCONS_00005711 |
| TCONS_00005508 |
| TCONS_00005366 |
| TCONS_00005365 |
| TCONS_00005360 |
| TCONS_00005222 |
| TCONS_00005215 |
| TCONS_00005196 |
| TCONS_00005192 |
| TCONS_00005168 |
| TCONS_00005128 |
| TCONS_00005105 |
| TCONS_00005104 |
| TCONS_00005069 |
| TCONS_00005057 |
| TCONS_00005056 |
| TCONS_00005055 |
| TCONS_00005051 |
| TCONS_00004986 |

|                |
|----------------|
| TCONS_00004963 |
| TCONS_00004944 |
| TCONS_00004943 |
| TCONS_00004880 |
| TCONS_00004873 |
| TCONS_00004869 |
| TCONS_00004842 |
| TCONS_00004841 |
| TCONS_00004838 |
| TCONS_00004782 |
| TCONS_00004750 |
| TCONS_00004742 |
| TCONS_00004741 |
| TCONS_00004726 |
| TCONS_00004704 |
| TCONS_00004655 |
| TCONS_00004619 |
| TCONS_00004610 |
| TCONS_00004577 |
| TCONS_00004570 |
| TCONS_00004557 |
| TCONS_00004532 |

|                |
|----------------|
| TCONS_00004501 |
| TCONS_00004490 |
| TCONS_00004467 |
| TCONS_00004462 |
| TCONS_00004440 |
| TCONS_00004422 |
| TCONS_00004415 |
| TCONS_00004414 |
| TCONS_00004409 |
| TCONS_00004375 |
| TCONS_00004374 |
| TCONS_00004370 |
| TCONS_00004368 |
| TCONS_00004366 |
| TCONS_00004365 |
| TCONS_00004340 |
| TCONS_00004327 |
| TCONS_00004325 |
| TCONS_00000200 |
| TCONS_00004306 |
| TCONS_00004303 |
| TCONS_00004299 |

|                |
|----------------|
| TCONS_00004287 |
| TCONS_00004267 |
| TCONS_00004241 |
| TCONS_00004230 |
| TCONS_00004225 |
| TCONS_00004224 |
| TCONS_00004216 |
| TCONS_00004173 |
| TCONS_00004164 |
| TCONS_00004163 |
| TCONS_00004106 |
| TCONS_00004063 |
| TCONS_00004060 |
| TCONS_00004057 |
| TCONS_00004049 |
| TCONS_00004043 |
| TCONS_00004042 |
| TCONS_00004033 |
| TCONS_00004015 |
| TCONS_00004000 |
| TCONS_00003998 |
| TCONS_00003991 |



|                |
|----------------|
| TCONS_00003970 |
| TCONS_00003965 |
| TCONS_00003962 |
| TCONS_00003930 |
| TCONS_00003924 |
| TCONS_00003916 |
| TCONS_00003897 |
| TCONS_00003838 |
| TCONS_00003833 |
| TCONS_00003817 |
| TCONS_00003799 |
| TCONS_00003794 |
| TCONS_00003770 |
| TCONS_00003709 |
| TCONS_00003663 |
| TCONS_00003661 |
| TCONS_00003660 |
| TCONS_00003658 |
| TCONS_00003637 |
| TCONS_00003615 |
| TCONS_00003612 |
| TCONS_00003565 |

|                |
|----------------|
| TCONS_00003564 |
| TCONS_00003563 |
| TCONS_00003531 |
| TCONS_00003530 |
| TCONS_00003380 |
| TCONS_00002980 |
| TCONS_00002935 |
| TCONS_00002703 |
| TCONS_00002580 |
| TCONS_00002568 |
| TCONS_00002468 |
| TCONS_00002381 |
| TCONS_00002376 |
| TCONS_00002290 |
| TCONS_00002275 |
| TCONS_00002272 |
| TCONS_00002219 |
| TCONS_00002094 |
| TCONS_00001987 |
| TCONS_00001962 |
| TCONS_00001961 |
| TCONS_00001924 |

|                |
|----------------|
| TCONS_00001880 |
| TCONS_00001853 |
| TCONS_00001841 |
| TCONS_00001838 |
| TCONS_00001829 |
| TCONS_00001814 |
| TCONS_00001810 |
| TCONS_00001809 |
| TCONS_00001807 |
| TCONS_00001763 |
| TCONS_00001762 |
| TCONS_00001745 |
| TCONS_00001737 |
| TCONS_00001691 |
| TCONS_00001690 |
| TCONS_00001679 |
| TCONS_00001675 |
| TCONS_00001644 |
| TCONS_00001640 |
| TCONS_00001634 |
| TCONS_00001623 |
| TCONS_00001603 |

|                |
|----------------|
| TCONS_00001602 |
| TCONS_00001590 |
| TCONS_00001584 |
| TCONS_00001527 |
| TCONS_00001494 |
| TCONS_00001489 |
| TCONS_00001483 |
| TCONS_00001459 |
| TCONS_00001454 |
| TCONS_00001448 |
| TCONS_00001446 |
| TCONS_00001418 |
| TCONS_00001368 |
| TCONS_00001363 |
| TCONS_00001362 |
| TCONS_00001330 |
| TCONS_00001324 |
| TCONS_00001294 |
| TCONS_00001282 |
| TCONS_00001270 |
| TCONS_00001268 |
| TCONS_00001266 |

|                |
|----------------|
| TCONS_00001255 |
| TCONS_00001254 |
| TCONS_00001243 |
| TCONS_00001219 |
| TCONS_00001218 |
| TCONS_00001181 |
| TCONS_00001175 |
| TCONS_00001172 |
| TCONS_00001146 |
| TCONS_00001140 |
| TCONS_00001103 |
| TCONS_00001094 |
| TCONS_00000976 |
| TCONS_00000964 |
| TCONS_00000947 |
| TCONS_00000937 |
| TCONS_00000918 |
| TCONS_00000890 |
| TCONS_00000873 |
| TCONS_00000870 |
| TCONS_00000864 |
